# Supplementary material
Source: PubMed Central journal article supplement (PMC6143117)
Supplement: jamaneurol-75-1106-s001.pdf [file jamaneurol-75-1106-s001.pdf]

## Supplementary Online Content

Chen S-P, Chou K-H, Fuh J-L, et al. Dynamic changes in white matter hyperintensities in reversible cerebral vasoconstriction syndrome. *JAMA Neurol*. Published online June 4, 2018. doi:10.1001/jamaneurol.2018.1321

**eTable 1.** Characteristics of the current cohort (n = 65)

**eTable 2.** Spatial and temporal distribution of white matter hyperintensity lesions during the disease course

**eTable 3.** Exploratory analyses for the correlation between volume of white matter hyperintensity lesions and vascular parameters throughout the disease course

**eTable 4.** Correlation between clinical variables and the volume of white matter hyperintense lesions (in the initial MRI)

**eFigure 1.** Box plot showing the distribution of the sizes of lesions identified on the first isotropic 3-dimension fluid-attenuated inversion recovery images

**eFigure 2.** Diagram of patient screening and enrollment

**eFigure 3.** Relationship between the white matter hyperintensity lesion load and the severity of vasoconstriction indicated by the Lindegaard index along the disease course

This supplementary material has been provided by the authors to give readers additional information about their work.

**eTable 1.** Characteristics of the current cohort (n = 65)

|                                                               |                    |
|---------------------------------------------------------------|--------------------|
| <b>Variables</b>                                              |                    |
| <b>Age, mean ± SD (range)</b>                                 | 50.1 ± 8.9 (26-67) |
| <b>Male, n (%)</b>                                            | 7 (10.8)           |
| <b>Hypertension, n (%)</b>                                    | 7 (10.8)           |
| <b>Migraine<sup>a</sup>, n (%)</b>                            | 16 (24.6)          |
| <b>Menopause<sup>b</sup>, n (%)</b>                           | 29 (50.0)          |
| <b>Blood pressure surge, n (%)</b>                            | 28 (43.1)          |
| <b>Possible secondary causes or associated conditions</b>     | 6 (9.2)            |
| <b>PRES, n (%)</b>                                            | 3 (4.6)            |
| <b>ICH, n (%)</b>                                             | 1 (1.5)            |
| <b>Ischemic stroke, n (%)</b>                                 | 1 (1.5)            |
| <b>Cortical SAH, n (%)</b>                                    | 1 (1.5)            |
| <b>Number of total TCH,</b>                                   | 5.8 ± 7.6          |
| <b>Headache duration</b>                                      | 10.2 ± 7.2         |
| <b>Headache Triggers, n (%)</b>                               |                    |
| Bathing                                                       | 16 (24.6)          |
| Exertion                                                      | 10 (15.3)          |
| Cough                                                         | 4 (6.2)            |
| Defecation                                                    | 19 (29.2)          |
| Rage                                                          | 11 (16.9)          |
| Sexual activity                                               | 9 (13.8)           |
| <b>Accompanying symptoms, n (%)</b>                           |                    |
| Nausea                                                        | 33 (50.8)          |
| Vomiting                                                      | 23 (35.4)          |
| Photophobia                                                   | 10 (15.4)          |
| Phonophobia                                                   | 14 (21.5)          |
| <b>Number of magnetic resonance images, mean ± SD (range)</b> | 2.5 ± 0.5 (2-3)    |

<sup>a</sup>all were migraine without aura; <sup>b</sup>only in female.

ICH: intracerebral hemorrhage; PRES: posterior reversible encephalopathy syndrome; TCH: thunderclap headache;

WMH: white matter hyperintensity

**eTable 2.** Spatial and temporal distribution of white matter hyperintensity lesions during the disease course

| WMH volume, cm <sup>3</sup> ; Mean ± SD (range)  |                        |                           |                                       |                                         |                                       |                           |                           |
|--------------------------------------------------|------------------------|---------------------------|---------------------------------------|-----------------------------------------|---------------------------------------|---------------------------|---------------------------|
| Duration from headache onset, days (Patient No.) |                        | 1-7d<br>(18)              | 8-14d<br>(28)                         | 15-21d<br>(21)                          | 22-28d<br>(23)                        | 29-60d<br>(35)            | 61-90d<br>(36)            |
| <b>Whole brain</b>                               |                        | 1.65±2.53<br>(0.00-9.95)  | 1.27±1.31<br>(0.13-5.20)              | 3.05± 4.35 <sup>a</sup><br>(0.13-16.33) | 1.07±0.78 <sup>b</sup><br>(0.11-2.30) | 1.49±1.44<br>(0.31-5.65)  | 1.00±0.63<br>(0.05-2.32)  |
| <b>Periventricular white matter</b>              |                        | 1.12±1.47<br>(0.00-5.85)  | 1.02±1.02<br>(0.13-4.73)              | 2.25±3.15 <sup>a</sup><br>(0.11-11.39)  | 0.83±0.64 <sup>b</sup><br>(0.10-1.94) | 1.03±1.22<br>(0.19-5.14)  | 0.77±0.50<br>(0.05-1.70)  |
| <b>Deep white matter</b>                         |                        | 0.53±1.08<br>(0.00-4.10)  | 0.24±0.40<br>(0.00-2.02)              | 0.80±1.31<br>(0.01-4.94)                | 0.23±0.27<br>(0.01-0.86)              | 0.46±0.70<br>(0.03-2.36)  | 0.22±0.18<br>(0.00-0.69)  |
| <b>Brainstem and cerebellum</b>                  |                        | 0.00±0.01<br>(0.00-0.04)  | 0.01±0.03<br>(0.00-0.17)              | 0.00±0.01<br>(0.00-0.03)                | 0.01±0.02<br>(0.00-0.06)              | 0.00±0.01<br>(0.00-0.02)  | 0.01±0.02<br>(0.00-0.08)  |
| <b>Specific anatomical locations</b>             |                        |                           |                                       |                                         |                                       |                           |                           |
| <b>Frontal</b>                                   | <i>Total</i>           | 0.86±1.65<br>(0.00-6.08)  | 0.57±0.69<br>(0.07-3.43)              | 1.39± 2.30 <sup>a</sup><br>(0.00-8.50)  | 0.43±0.36 <sup>b</sup><br>(0.02-1.14) | 0.72±0.97<br>(0.03-3.82)  | 0.47±0.37<br>(0.00-1.21)  |
|                                                  | <i>Periventricular</i> | 0.53±0.71<br>(0.00-2.70)  | 0.52±0.61<br>(0.07-3.05)              | 1.16±1.81 <sup>a</sup><br>(0.00-6.56)   | 0.39±0.33 <sup>b</sup><br>(0.02-1.05) | 0.53±0.80<br>(0.02-3.38)  | 0.43±0.36<br>(0.00-1.13)  |
|                                                  | <i>Deep</i>            | 0.33±0.95<br>(0.00-3.38)  | 0.05±0.10<br>(0.00-0.38)              | 0.22±0.52<br>(0.00-1.94)                | 0.05± 0.07<br>(0.00-0.20)             | 0.19±0.48<br>(0.00-1.92)  | 0.04± 0.06<br>(0.00-0.23) |
| <b>Parietal</b>                                  | <i>Total</i>           | 0.12±0.34<br>(0.00-1.11)  | 0.03±0.07<br>(0.00-0.29)              | 0.36±0.90 <sup>a</sup><br>(0.00-3.32)   | 0.02±0.04 <sup>b</sup><br>(0.00-0.13) | 0.10± 0.33<br>(0.00-1.30) | 0.03± 0.04<br>(0.00-0.17) |
|                                                  | <i>Periventricular</i> | 0.09± 0.27<br>(0.00-0.90) | 0.02±0.06 <sup>b</sup><br>(0.00-0.22) | 0.10± 0.30<br>(0.00-1.10)               | 0.01±0.01<br>(0.00-0.04)              | 0.02± 0.06<br>(0.00-0.24) | 0.02±0.04<br>(0.00-0.14)  |
|                                                  | <i>Deep</i>            | 0.03±0.07<br>(0.00-0.25)  | 0.01± 0.02<br>(0.00-0.07)             | 0.26±0.61 <sup>a</sup><br>(0.00-2.22)   | 0.01±0.04 <sup>b</sup><br>(0.00-0.12) | 0.08±0.32<br>(0.00-1.30)  | 0.01± 0.02<br>(0.00-0.07) |
| <b>Temporal</b>                                  | <i>Total</i>           | 0.14±0.33<br>(0.00-1.29)  | 0.09±0.15<br>(0.00-0.62)              | 0.23±0.43<br>(0.00-1.57)                | 0.05±0.05<br>(0.00-0.17)              | 0.08±0.13<br>(0.00-0.55)  | 0.05±0.05<br>(0.00-0.19)  |
|                                                  | <i>Periventricular</i> | 0.14± 0.32<br>(0.00-1.27) | 0.08±0.13<br>(0.00-0.51)              | 0.18±0.35<br>(0.00-1.26)                | 0.04±0.05 <sup>b</sup><br>(0.00-0.16) | 0.08± 0.13<br>(0.00-0.55) | 0.04±0.04<br>(0.00-0.14)  |
|                                                  | <i>Deep</i>            | 0.00±0.01<br>(0.00-0.02)  | 0.01± 0.03<br>(0.00-0.15)             | 0.04±0.09<br>(0.00-0.31)                | 0.01±0.01<br>(0.00-0.04)              | 0.00±0.01<br>(0.00-0.03)  | 0.01±0.01<br>(0.00-0.05)  |
| <b>Occipital</b>                                 | <i>Total</i>           | 0.13±0.09<br>(0.00-0.29)  | 0.14±0.31<br>(0.00-1.61)              | 0.22±0.27<br>(0.00-0.88)                | 0.11± 0.10<br>(0.00-0.26)             | 0.12±0.11<br>(0.00-0.43)  | 0.13±0.13<br>(0.00-0.49)  |
|                                                  | <i>Periventricular</i> | 0.00± 0.01<br>(0.00-0.03) | 0.00±0.00<br>(0.00-0.02)              | 0.02± 0.16 <sup>a</sup><br>(0.00-0.20)  | 0.00±0.01 <sup>b</sup><br>(0.00-0.02) | 0.00± 0.00<br>(0.00-0.01) | 0.00± 0.00<br>(0.00-0.01) |
|                                                  | <i>Deep</i>            | 0.13±0.09                 | 0.14±0.31                             | 0.20±0.27                               | 0.11± 0.10                            | 0.12±0.11                 | 0.13±0.13                 |

|                                                      |                        | (0.00-0.29)               | (0.00-1.59)               | (0.00-0.88)                           | (0.00-0.25)                           | (0.00-0.43)               | (0.00-0.49)               |
|------------------------------------------------------|------------------------|---------------------------|---------------------------|---------------------------------------|---------------------------------------|---------------------------|---------------------------|
| <b>WMH volume, cm<sup>3</sup>; Mean ± SD (range)</b> |                        |                           |                           |                                       |                                       |                           |                           |
| <b>Limbic</b>                                        | <i>Total</i>           | 0.11±0.13<br>(0.00-0.56)  | 0.12±0.13<br>(0.01-0.52)  | 0.35±0.56 <sup>a</sup><br>(0.00-2.00) | 0.13±0.19<br>(0.00-0.63)              | 0.17±0.24<br>(0.01-0.93)  | 0.09±0.07<br>(0.01-0.24)  |
|                                                      | <i>Periventricular</i> | 0.09±0.11<br>(0.00-0.39)  | 0.10±0.10<br>(0.01-0.39)  | 0.29±0.48 <sup>a</sup><br>(0.00-1.68) | 0.08±0.08 <sup>b</sup><br>(0.00-0.26) | 0.12± 0.14<br>(0.00-0.48) | 0.06± 0.05<br>(0.01-0.18) |
|                                                      | <i>Deep</i>            | 0.02± 0.04<br>(0.00-0.17) | 0.02± 0.04<br>(0.00-0.13) | 0.06±0.09<br>(0.00-0.32)              | 0.05±0.12<br>(0.00-0.37)              | 0.05±0.15<br>(0.00-0.60)  | 0.02±0.03<br>(0.00-0.13)  |
| <b>Subcortical</b>                                   | <i>Total</i>           | 0.28±0.21<br>(0.00-0.77)  | 0.31±0.28<br>(0.04-1.08)  | 0.50±0.49<br>(0.00-1.22)              | 0.33±0.26<br>(0.04-0.85)              | 0.30±0.24<br>(0.05-0.98)  | 0.23±0.16<br>(0.01-0.54)  |
|                                                      | <i>Periventricular</i> | 0.27± 0.20<br>(0.00-0.77) | 0.30±0.27<br>(0.04-1.01)  | 0.49± 0.48<br>(0.00-1.22)             | 0.32± 0.26<br>(0.04-0.83)             | 0.29± 0.24<br>(0.04-0.95) | 0.21±0.14<br>(0.01-0.45)  |
|                                                      | <i>Deep</i>            | 0.01±0.01<br>(0.00-0.05)  | 0.01±0.02<br>(0.00-0.07)  | 0.01±0.03<br>(0.00-0.10)              | 0.01± 0.01<br>(0.00-0.03)             | 0.01±0.01<br>(0.00-0.04)  | 0.01±0.03<br>(0.00-0.09)  |

<sup>a</sup>Significant increase (p<0.05) compared with the value from the previous time period.

<sup>b</sup>Significant decrease (p<0.05) compared with the value from the previous time period.

**eTable 3.** Exploratory analyses for the correlation between volume of white matter hyperintensity lesions and vascular parameters throughout the disease course

| WMH                             | LI     |        | PI <sub>ICA</sub> |        | RI <sub>ICA</sub> |        | MMPI  |        | MMRI   |        | MRIR   |       |
|---------------------------------|--------|--------|-------------------|--------|-------------------|--------|-------|--------|--------|--------|--------|-------|
|                                 | r      | p      | r                 | p      | r                 | p      | r     | p      | r      | p      | r      | p     |
| <b>Whole brain</b>              | 0.154  | 0.024  | 0.256             | <0.001 | 0.258             | <0.001 | 0.264 | 0.003  | 0.179  | 0.045  | 0.010  | 0.914 |
| <b>Periventricular</b>          | 0.236  | <0.001 | 0.279             | <0.001 | 0.273             | <0.001 | 0.325 | <0.001 | 0.236  | 0.007  | -0.027 | 0.760 |
| <i>Frontal</i>                  | 0.249  | <0.001 | 0.254             | 0.001  | 0.248             | 0.001  | 0.262 | 0.004  | 0.193  | 0.030  | -0.048 | 0.539 |
| <i>Parietal</i>                 | 0.148  | 0.029  | 0.155             | 0.045  | 0.154             | 0.046  | 0.080 | 0.381  | -0.018 | 0.841  | -0.088 | 0.321 |
| <i>Temporal</i>                 | 0.270  | <0.001 | 0.221             | 0.004  | 0.216             | 0.005  | 0.032 | 0.010  | 0.176  | 0.048  | -0.018 | 0.857 |
| <i>Occipital</i>                | 0.190  | 0.005  | 0.175             | 0.023  | 0.170             | 0.028  | 0.257 | 0.004  | 0.227  | 0.010  | 0.132  | 0.139 |
| <i>Limbic</i>                   | 0.049  | 0.473  | 0.247             | 0.001  | 0.243             | 0.002  | 0.294 | 0.001  | 0.182  | 0.041  | 0.044  | 0.625 |
| <i>Subcortical</i>              | 0.177  | 0.009  | 0.253             | 0.001  | 0.247             | 0.001  | 0.344 | <0.001 | 0.236  | 0.007  | -0.028 | 0.757 |
| <b>Deep</b>                     | 0.059  | 0.385  | 0.229             | <0.001 | 0.225             | <0.001 | 0.161 | 0.076  | 0.086  | 0.336  | 0.082  | 0.357 |
| <i>Frontal</i>                  | -0.023 | 0.741  | 0.202             | 0.009  | 0.200             | 0.010  | 0.229 | 0.011  | 0.163  | 0.067  | 0.011  | 0.901 |
| <i>Parietal</i>                 | 0.020  | 0.070  | 0.042             | 0.590  | 0.024             | 0.755  | 0.096 | 0.295  | 0.034  | 0.708  | -0.094 | 0.289 |
| <i>Temporal</i>                 | 0.000  | 0.998  | 0.160             | 0.039  | 0.153             | 0.048  | 0.361 | <0.001 | 0.338  | <0.001 | 0.040  | 0.653 |
| <i>Occipital</i>                | 0.347  | <0.001 | 0.011             | 0.892  | 0.024             | 0.760  | 0.104 | 0.256  | 0.027  | 0.763  | 0.075  | 0.399 |
| <i>Limbic</i>                   | -0.018 | 0.790  | 0.085             | 0.275  | 0.070             | 0.367  | 0.177 | 0.050  | 0.120  | 0.179  | 0.145  | 0.103 |
| <i>Subcortical</i>              | -0.038 | 0.566  | 0.222             | 0.004  | 0.212             | 0.006  | 0.275 | 0.002  | 0.208  | 0.019  | 0.017  | 0.848 |
| <b>Brainstem and cerebellum</b> | -0.033 | 0.742  | 0.178             | 0.021  | 0.171             | 0.027  | 0.187 | 0.039  | 0.153  | 0.087  | 0.049  | 0.580 |

MMPI: The mean of pulsatility index in the distal and proximal M1 segment of both middle cerebral arteries; MMRI: The mean of resistance index in the distal and proximal M1 segment of both middle cerebral arteries; MRIR: the mean ratio of resistance index along M1 (distal RI to proximal RI); PI<sub>ICA</sub>: pulsatility index of internal carotid artery; RI<sub>ICA</sub>: resistance index of internal carotid artery; r: correlation coefficient.

**eTable 4.** Correlation between clinical variables and the volume of white matter hyperintense lesions (in the initial MRI)

| Variables                          | Total volume of WMH                |             | P value        |
|------------------------------------|------------------------------------|-------------|----------------|
|                                    | + variable                         | -variable   |                |
| <b>Male</b>                        | 0.57 ± 0.57                        | 1.82 ± 2.47 | 0.114          |
| <b>Hypertension</b>                | 1.45 ± 2.53                        | 1.70 ± 2.33 | 0.771          |
| <b>Migraine<sup>a</sup></b>        | 2.17 ± 2.07                        | 1.48 ± 2.42 | 0.231          |
| <b>Menopause<sup>b</sup></b>       | 2.14 ± 3.17                        | 1.48 ± 1.28 | 0.263          |
| <b>Blood pressure surge</b>        | 1.65 ± 3.06                        | 1.70 ± 1.92 | 0.938          |
| <b>Headache Triggers</b>           |                                    |             |                |
| Bathing                            | 1.55 ± 1.79                        | 1.73 ± 2.64 | 0.802          |
| Exertion                           | 1.21 ± 1.71                        | 1.76 ± 2.55 | 0.541          |
| Cough                              | 1.81 ± 2.62                        | 1.67 ± 2.46 | 0.914          |
| Defecation                         | 1.34 ± 1.55                        | 1.81 ± 2.72 | 0.497          |
| Rage                               | 2.62 ± 4.68                        | 1.49 ± 1.72 | 0.447          |
| Sexual activity                    | 1.02 ± 1.10                        | 1.83 ± 2.64 | 0.303          |
| <b>Accompanying symptoms</b>       |                                    |             |                |
| Nausea                             | 1.54 ± 1.60                        | 2.32 ± 3.49 | 0.295          |
| Vomiting                           | 1.20 ± 1.18                        | 2.29 ± 3.16 | 0.079          |
| Photophobia                        | 1.38 ± 1.67                        | 2.04 ± 2.88 | 0.492          |
| Phonophobia                        | 1.31 ± 1.47                        | 2.11 ± 2.97 | 0.357          |
| <b>Clinical parameters</b>         |                                    |             |                |
|                                    | <b>Correlation coefficient (r)</b> |             | <b>P value</b> |
| <b>Age</b>                         | 0.153                              |             | 0.183          |
| <b>Number of total TCH</b>         | -0.096                             |             | 0.531          |
| <b>Headache duration</b>           | -0.148                             |             | 0.332          |
| <b>Number of headache triggers</b> | 0.011                              |             | 0.933          |

<sup>a</sup>all were migraine without aura; <sup>b</sup>only in female.

TCH: thunderclap headache; WMH: white matter hyperintensity

**eFigure 1.** Box plot showing the distribution of the sizes of lesions identified on the first isotropic 3-dimension fluid-attenuated inversion recovery images

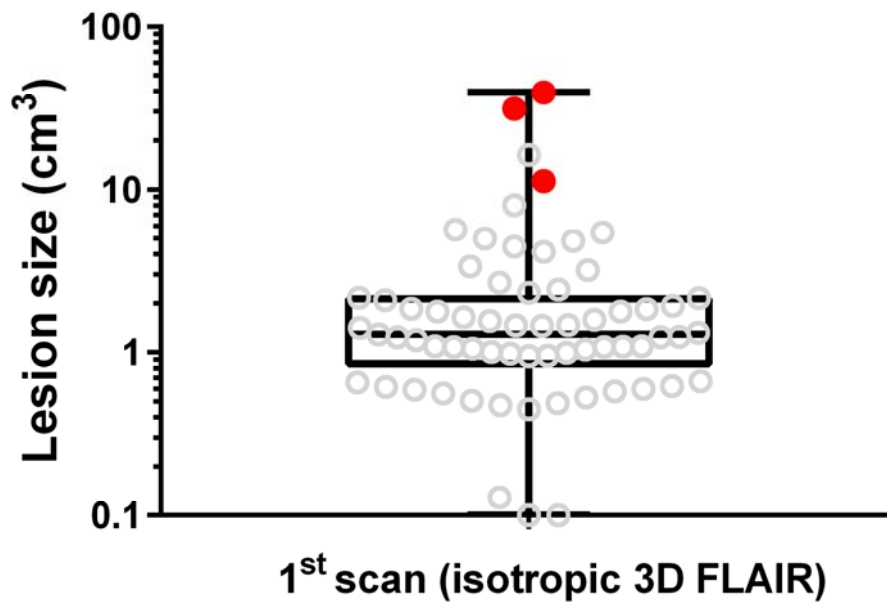

Each circle indicates the total lesion volume of each patient. Horizontal lines indicate mean and SDs. The red circles represent the total volumes of those with the PRES lesions that had significant signal changes on apparent diffusion coefficient mapping and diffusion weighted image. The upper and lower ends of the whiskers indicate the maximal and minimal values. Note that the scale of the Y axis is logarithmic.

**eFigure 2.** Diagram of patient screening and enrollment

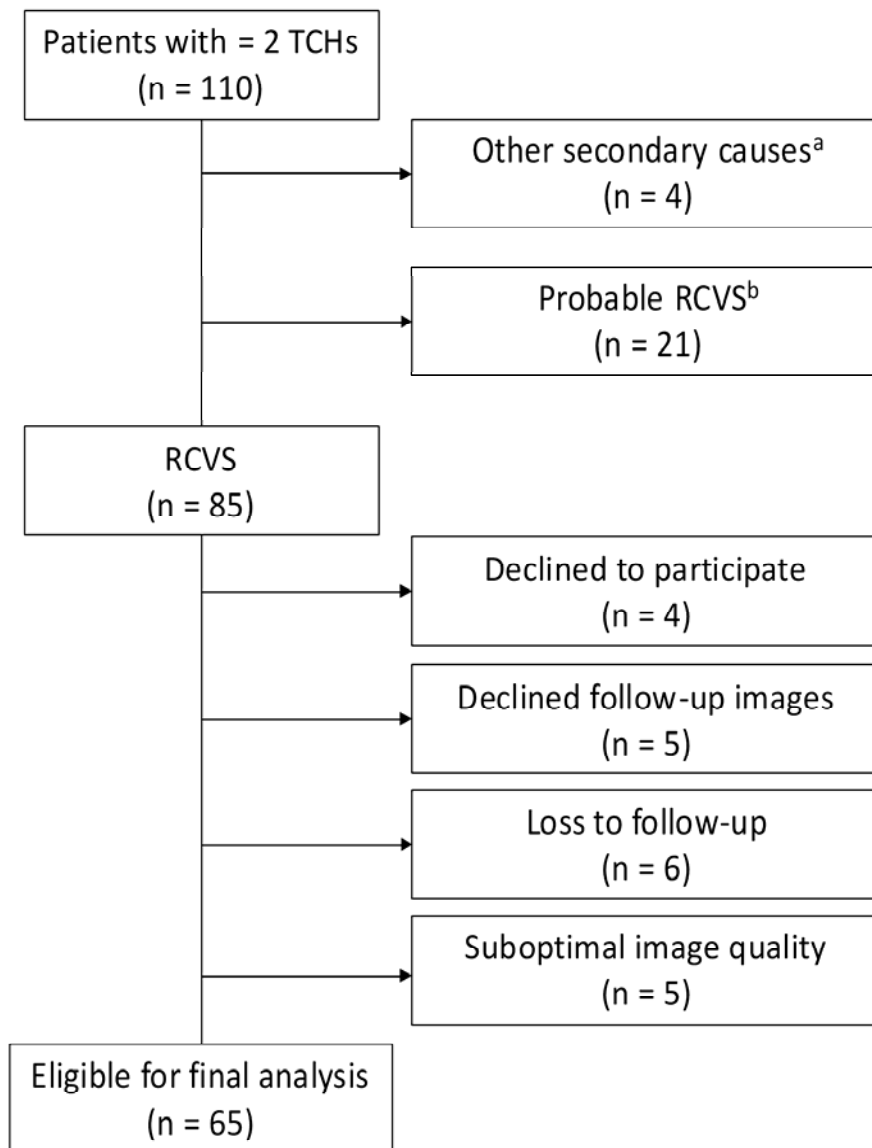

<sup>a</sup>Metastatic brain tumor (n = 2), sphenoid sinusitis (n = 1), aneurysmal subarachnoid hemorrhage (n = 1).

<sup>b</sup>Typical thunderclap headaches without significant vasoconstrictions on magnetic resonance angiography.



**eFigure 3.** Relationship between the white matter hyperintensity lesion load and the severity of vasoconstriction indicated by the Lindegaard index along the disease course

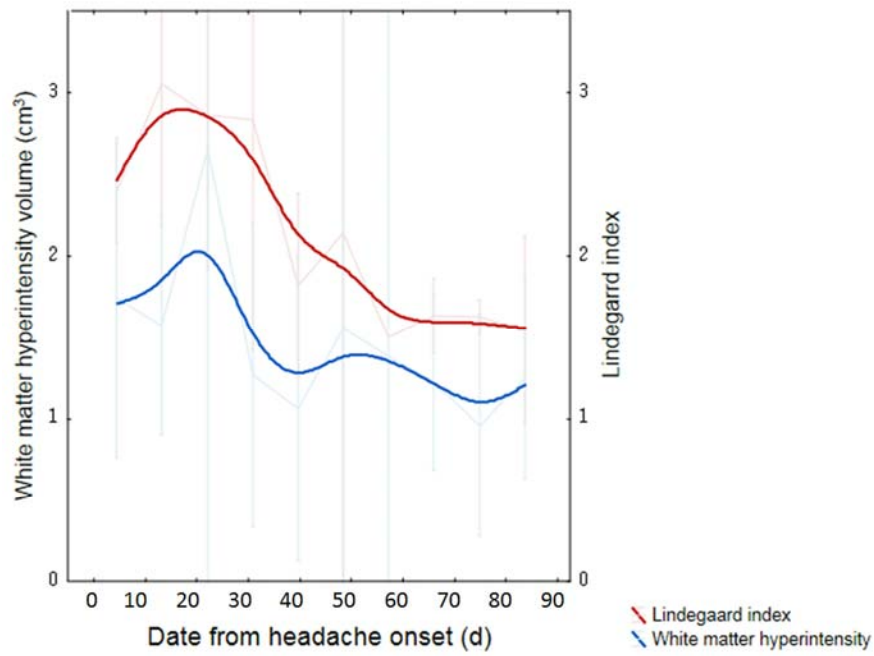

Vertical lines in the background indicates mean  $\pm$  standard deviation of white matter hyperintensity loads (blue) and the Lindegaard index (red).
